# Supplementary material for: Asynchronous Transformation of Cropping Patterns from 5800–2200 cal BP on the Southern Loess Plateau, China
Source: MDPI journal article supplement (doi:10.3390/land12020343), 2023-01-27
Supplement: s1 [file s1]

**Table S1.** Sites information with published archaeobotanical datasets during 5500–2200 cal BP in SLP.

| NO | Site         | Long    | Lat.   | Period        | Location        | References |
|----|--------------|---------|--------|---------------|-----------------|------------|
| 1  | Dadiwan      | 105.904 | 35.015 | Yangshao      | Gansu, Tianshui | [102]      |
| 2  | Caikeding    | 106.135 | 34.530 | Late Yangshao | Gansu, Tianshui | [69]       |
| 3  | Chaijiaping  | 106.050 | 34.544 | Late Yangshao | Gansu, Tianshui | [69]       |
| 4  | Chunshuwan   | 105.197 | 34.716 | Late Yangshao | Gansu, Tianshui | [69]       |
| 5  | Douwashan    | 105.446 | 34.778 | Late Yangshao | Gansu, Tianshui | [69]       |
| 6  | Huidi'er     | 105.296 | 34.766 | Late Yangshao | Gansu, Tianshui | [69]       |
| 7  | Liujiadun    | 105.082 | 34.759 | Late Yangshao | Gansu, Tianshui | [69]       |
| 8  | Liujiaping   | 105.237 | 34.760 | Late Yangshao | Gansu, Tianshui | [69]       |
| 9  | Nuanquanshan | 104.687 | 34.947 | Late Yangshao | Gansu, Dingxi   | [69]       |
| 10 | Shangrenwan  | 105.311 | 34.730 | Late Yangshao | Gansu, Tianshui | [69]       |
| 11 | Shanpingli   | 105.545 | 34.786 | Late Yangshao | Gansu, Tianshui | [69]       |
| 12 | Shizidao     | 105.355 | 34.772 | Late Yangshao | Gansu, Tianshui | [69]       |
| 13 | Wayaoding    | 105.325 | 34.718 | Late Yangshao | Gansu, Tianshui | [69]       |
| 14 | Xiewanding   | 105.418 | 34.853 | Late Yangshao | Gansu, Tianshui | [69]       |
| 15 | Xishanping   | 105.672 | 34.526 | Late Yangshao | Gansu, Tianshui | [69]       |
| 16 | Yangjiaping  | 105.389 | 34.789 | Late Yangshao | Gansu, Tianshui | [69]       |
| 17 | Yingwuwa     | 105.083 | 34.907 | Late Yangshao | Gansu, Tianshui | [69]       |
| 18 | Yujiawa      | 105.076 | 34.720 | Late Yangshao | Gansu, Tianshui | [69]       |
| 19 | Zhoujiawan   | 106.301 | 34.517 | Late Yangshao | Gansu, Tianshui | [69]       |
| 20 | Bupo         | 105.075 | 34.707 | Majiayao      | Gansu, Tianshui | [69]       |
| 21 | Lixinzhen    | 105.081 | 34.909 | Majiayao      | Gansu, Tianshui | [69]       |
| 22 | Shizhaocun   | 105.562 | 34.569 | Majiayao      | Gansu, Tianshui | [69]       |
| 23 | Yangwa       | 105.327 | 34.703 | Majiayao      | Gansu, Tianshui | [69]       |
| 24 | Fanjiacheng  | 105.651 | 34.710 | Qijia         | Gansu, Tianshui | [69]       |

|    |                      |         |        |           |                   |       |
|----|----------------------|---------|--------|-----------|-------------------|-------|
| 25 | Shuiquangou          | 105.125 | 34.615 | Qijia     | Gansu, Tianshui   | [69]  |
| 26 | Siping               | 105.400 | 34.789 | Qijia     | Gansu, Tianshui   | [69]  |
| 27 | Shipocun             | 105.388 | 34.764 | Qijia     | Gansu, Tianshui   | [69]  |
| 28 | Sishilipu            | 105.153 | 34.753 | Qijia     | Gansu, Tianshui   | [69]  |
| 29 | Weishuiyu            | 105.431 | 34.741 | Qijia     | Gansu, Tianshui   | [69]  |
| 30 | Wujiaping            | 105.092 | 34.781 | Qijia     | Gansu, Tianshui   | [69]  |
| 31 | Yierjidianguandi     | 105.276 | 34.766 | Qijia     | Gansu, Tianshui   | [69]  |
| 32 | Yuangudui            | 105.227 | 34.762 | Qijia     | Gansu, Tianshui   | [69]  |
| 33 | Zhengjiashanliang    | 105.447 | 34.845 | Qijia     | Gansu, Tianshui   | [69]  |
| 34 | Beiposi              | 105.105 | 34.714 | Siwa      | Gansu, Tianshui   | [69]  |
| 35 | Cheng'erping         | 105.202 | 34.754 | Siwa      | Gansu, Tianshui   | [69]  |
| 36 | Diantiandi           | 105.145 | 34.702 | Siwa      | Gansu, Tianshui   | [69]  |
| 37 | Dongjiaping          | 105.139 | 34.700 | Siwa      | Gansu, Tianshui   | [69]  |
| 38 | Laoyeshan            | 105.123 | 34.779 | Siwa      | Gansu, Tianshui   | [69]  |
| 39 | Longxixihetan        | 104.625 | 35.018 | Siwa      | Gansu, Longxi     | [69]  |
| 40 | Majiayao             | 105.118 | 34.702 | Siwa      | Gansu, Dingxi     | [69]  |
| 41 | Qinjiaping           | 105.181 | 34.700 | Siwa      | Gansu, Tianshui   | [69]  |
| 42 | Ruji                 | 105.724 | 34.583 | Siwa      | Gansu, Tianshui   | [69]  |
| 43 | Sanjiaodi            | 105.376 | 34.785 | Siwa      | Gansu, Tianshui   | [69]  |
| 44 | Wanpenyao            | 105.190 | 34.745 | Siwa      | Gansu, Tianshui   | [69]  |
| 45 | Yaoshang             | 105.459 | 34.718 | Siwa      | Gansu, Tianshui   | [69]  |
| 46 | Anban                | 107.915 | 34.350 | Yangshao  | Shaanxi, Baoji    | [70]  |
| 47 | Zhouyuan(Wangjiazui) | 107.773 | 34.440 | Longshan  | Shaanxi, Baoji    | [49]  |
| 48 | Zhutong              | 107.868 | 34.471 | Zhouqin   | Shaanxi, Baoji    | [103] |
| 49 | Zaolinhetan          | 108.279 | 35.005 | Shangzhou | Shaanxi, Xianyang | [104] |
| 50 | Gongbeiya            | 108.905 | 34.180 | Yangshao  | Shaanxi, Xi'an    | [105] |

|    |              |         |        |                 |                  |       |
|----|--------------|---------|--------|-----------------|------------------|-------|
| 51 | Xinjie       | 109.147 | 34.254 | Late Yangshao   | Shaanxi, Xi'an   | [50]  |
| 52 | Yangguanzhai | 109.024 | 34.473 | Miaodigou       | Shaanxi, Xi'an   | [106] |
| 53 | Nanshantou   | 109.574 | 35.175 | Middle Yangshao | Shaanxi, Weinan  | [35]  |
| 54 | Xinglefang   | 109.984 | 34.542 | Middle Yangshao | Shaanxi, Weinan  | [47]  |
| 55 | Xiahe        | 109.699 | 35.131 | Middle Yangshao | Shaanxi, Weinan  | [47]  |
| 56 | Dongyang     | 109.641 | 34.381 | Yangshao        | Shaanxi, Weinan  | [107] |
| 57 | Muwanghe     | 109.692 | 35.144 | Yangshao        | Shaanxi, Weinan  | [35]  |
| 58 | Nanjiaokou   | 111.281 | 34.717 | Yangshao        | Henan, Sanmenxia | [108] |
| 59 | Yangshao     | 111.774 | 34.814 | Yangshao        | Henan, Sanmenxia | [51]  |
| 60 | Shangmotou   | 110.543 | 34.566 | Late Yangshao   | Henan, Sanmenxia | [51]  |
| 61 | Dongqiao     | 110.413 | 34.568 | Late Yangshao   | Henan, Sanmenxia | [51]  |
| 62 | Dongshe      | 110.368 | 34.524 | Late Yangshao   | Henan, Sanmenxia | [51]  |
| 63 | Sigeda       | 110.439 | 34.527 | Late Yangshao   | Henan, Sanmenxia | [51]  |
| 64 | Mengcun      | 110.922 | 34.659 | Late Yangshao   | Henan, Sanmenxia | [51]  |
| 65 | Yanzhuang    | 110.749 | 34.361 | Late Yangshao   | Henan, Sanmenxia | [51]  |
| 66 | Chengyan     | 110.936 | 34.469 | Late Yangshao   | Henan, Sanmenxia | [51]  |
| 67 | Nanyuan      | 111.204 | 34.609 | Late Yangshao   | Henan, Sanmenxia | [51]  |
| 68 | Renmazhai    | 111.199 | 34.656 | Late Yangshao   | Henan, Sanmenxia | [51]  |
| 69 | Lucun        | 111.156 | 34.704 | Late Yangshao   | Henan, Sanmenxia | [51]  |
| 70 | Wuyuan       | 111.056 | 34.666 | Late Yangshao   | Henan, Sanmenxia | [51]  |
| 71 | Duzhong      | 111.801 | 34.674 | Late Yangshao   | Henan, Sanmenxia | [51]  |
| 72 | Xiangshi     | 110.592 | 34.508 | Longshan        | Henan, Sanmenxia | [51]  |
| 73 | Qianling     | 110.838 | 34.411 | Longshan        | Henan, Sanmenxia | [51]  |
| 74 | Nantan       | 110.871 | 34.476 | Longshan        | Henan, Sanmenxia | [51]  |
| 75 | Zhangmao     | 111.369 | 34.720 | Longshan        | Henan, Sanmenxia | [51]  |
| 76 | Duanjiazhai  | 111.150 | 34.656 | Longshan        | Henan, Sanmenxia | [51]  |

|    |              |         |        |           |                  |      |
|----|--------------|---------|--------|-----------|------------------|------|
| 77 | Caocun       | 111.149 | 34.647 | Longshan  | Henan, Sanmenxia | [51] |
| 78 | Buzhaozhai   | 111.750 | 34.822 | Longshan  | Henan, Sanmenxia | [51] |
| 79 | Lusi         | 111.801 | 34.672 | Longshan  | Henan, Sanmenxia | [51] |
| 80 | Laohutou     | 110.909 | 34.670 | Shangzhou | Henan, Sanmenxia | [51] |
| 81 | Jiacunzhaizi | 110.743 | 34.349 | Shangzhou | Henan, Sanmenxia | [51] |
| 82 | Yanhuoya     | 110.713 | 34.322 | Shangzhou | Henan, Sanmenxia | [51] |
| 83 | Sanshengcun  | 110.920 | 34.569 | Shangzhou | Henan, Sanmenxia | [51] |

**Table S2.** Charred plant seeds identified from the 27 archaeological sites during 5500–2200 cal BP in Baoji.

| Site          | Culture       | Crop               |                      |                 |                      |                    | Weed | Total | Location           |
|---------------|---------------|--------------------|----------------------|-----------------|----------------------|--------------------|------|-------|--------------------|
|               |               | Setaria<br>italica | Panicum<br>miliaceum | Oryza<br>Sativa | Triticum<br>aestivum | Hordeum<br>vulgare |      |       |                    |
| Baguankou     | Miaodigou     | 65                 | 9                    | 7               | 0                    | 0                  | 47   | 128   | Shaanxi, Longxian  |
| Gaojiahe      | Miaodigou     | 254                | 37                   | 0               | 0                    | 0                  | 22   | 313   | Shaanxi, Fengxiang |
| Guanmaotou    | Miaodigou     | 62                 | 5                    | 0               | 0                    | 0                  | 15   | 82    | Shaanxi, Fengxiang |
| Madaokou      | Miaodigou     | 40                 | 23                   | 0               | 0                    | 0                  | 44   | 107   | Shaanxi, Fengxiang |
| Maizaoyu      | Miaodigou     | 57                 | 3                    | 0               | 0                    | 0                  | 86   | 146   | Shaanxi, Longxian  |
| Qiyang        | Miaodigou     | 155                | 122                  | 0               | 0                    | 0                  | 102  | 381   | Shaanxi, Fufeng    |
| Shuigou       | Miaodigou     | 123                | 15                   | 0               | 0                    | 0                  | 48   | 186   | Shaanxi, Fengxiang |
| Wangjiazui    | Miaodigou     | 193                | 10                   | 0               | 0                    | 0                  | 13   | 216   | Shaanxi, Fufeng    |
| Xinpingsi     | Miaodigou     | 203                | 28                   | 1               | 0                    | 0                  | 8    | 240   | Shaanxi, Longxian  |
| Yuanzitou     | Miaodigou     | 10144              | 5855                 | 1               | 0                    | 0                  | 250  | 16250 | Shaanxi, Longxian  |
| Anban         | Late Yangshao | 96                 | 5                    | 0               | 0                    | 0                  | 61   | 162   | Shaanxi, Fufeng    |
| Bianjiazhuang | Late Yangshao | 229                | 40                   | 27              | 0                    | 0                  | 105  | 401   | Shaanxi, Longxian  |
| Chaojiagou    | Late Yangshao | 21                 | 2                    | 0               | 0                    | 0                  | 19   | 42    | Shaanxi, Fengxiang |
| Dingtong      | Late Yangshao | 21                 | 2                    | 0               | 0                    | 0                  | 21   | 44    | Shaanxi, Fufeng    |
| Hengshui      | Late Yangshao | 30                 | 5                    | 0               | 0                    | 0                  | 14   | 49    | Shaanxi, Fengxiang |

|                   |               |       |      |    |     |   |     |       |                    |
|-------------------|---------------|-------|------|----|-----|---|-----|-------|--------------------|
| Xiaoyuan          | Late Yangshao | 69    | 19   | 0  | 0   | 0 | 49  | 137   | Shaanxi, Fengxiang |
| Daxin             | Longshan      | 14    | 3    | 0  | 0   | 0 | 22  | 39    | Shaanxi, Fengxiang |
| Madaokou          | Longshan      | 45    | 1    | 0  | 0   | 0 | 70  | 116   | Shaanxi, Fengxiang |
| Maizaoyu          | Longshan      | 212   | 37   | 24 | 0   | 0 | 25  | 298   | Shaanxi, Longxian  |
| Mogouyuan         | Longshan      | 350   | 139  | 20 | 0   | 0 | 107 | 616   | Shaanxi, Longxian  |
| Shuang'an         | Longshan      | 51    | 4    | 0  | 1   | 1 | 26  | 83    | Shaanxi, Fufeng    |
| Shuigou           | Longshan      | 98    | 10   | 0  | 0   | 0 | 45  | 153   | Shaanxi, Fengxiang |
| Xiaoyuan          | Longshan      | 7     | 0    | 0  | 0   | 0 | 6   | 13    | Shaanxi, Fengxiang |
| Xinpingsi         | Longshan      | 266   | 79   | 2  | 0   | 0 | 32  | 379   | Shaanxi, Longxian  |
| Yaobai            | Longshan      | 39    | 3    | 0  | 0   | 0 | 20  | 62    | Shaanxi, Fufeng    |
| Yaozi'ao          | Longshan      | 200   | 11   | 1  | 0   | 0 | 134 | 346   | Shaanxi, Fengxiang |
| Yuxiang           | Longshan      | 77    | 3    | 11 | 0   | 0 | 107 | 198   | Shaanxi, Fengxiang |
| Baguankou         | Zhou-Qin      | 148   | 57   | 0  | 16  | 0 | 136 | 357   | Shaanxi, Longxian  |
| Daxin             | Zhou-Qin      | 140   | 6    | 0  | 685 | 0 | 55  | 886   | Shaanxi, Fengxiang |
| Lijiagou          | Zhou-Qin      | 8     | 0    | 0  | 2   | 0 | 1   | 11    | Shaanxi, Fengxiang |
| Lujiacun          | Zhou-Qin      | 15000 | 2000 | 0  | 12  | 0 | 60  | 17072 | Shaanxi, Fufeng    |
| Shenjiazui        | Zhou-Qin      | 230   | 29   | 1  | 131 | 0 | 43  | 434   | Shaanxi, Longxian  |
| Tiezhang          | Zhou-Qin      | 182   | 8    | 0  | 0   | 0 | 50  | 240   | Shaanxi, Fufeng    |
| Yaoziao           | Zhou-Qin      | 33    | 3    | 0  | 4   | 0 | 42  | 82    | Shaanxi, Fengxiang |
| Yuxiang           | Zhou-Qin      | 33    | 2    | 0  | 1   | 1 | 21  | 58    | Shaanxi, Fengxiang |
| Zhouyuan(Fengchu) | Zhou-Qin      | 180   | 9    | 0  | 5   | 0 | 73  | 267   | Shaanxi, Fufeng    |

## References

102. Liu, C.J.; Kong, Z.C.; Lang, S.D. Relics of crops and discussion on the environment of primitive people living in Dadiwan site. *Cul Rel Central China*, 2004, 4, 26–30. (In Chinese)
103. Zhouyuan Archaeological Working Team. The excavation of Zhuangli village at Zhutong site of western Zhou in the springs of 2003 and 2004. *Acta Archaeol Sin*, 2011, 2, 245–316. (In Chinese)
104. Chen, S.Y.; Fu, W.B. Liu, J.Q.; Tang, L.Y.; Zhai, L.L.; Zhao, Z.J.; Wen, R. Study on Remains of Carbonized Plant in Zaolin River Beach Site in Xunyi, Shaanxi Province. *Cult Relics South China* 2019, 1, 103–112. (In Chinese)
105. Tang, L.Y.; Yang, J.H.; Guo, X.; Tian, J.; Han, K.; Zhang, X.Y. Consistency and imbalance of agricultural production in the Guanzhong region in the pre-Qin period: Evidence from the Gongbeiya site in Xi'an. *Cult Relics South China* 2020, 4, 163–172. (In Chinese)
106. Zhong, H.; Li, X.W.; Wang, W. L.; Yang, L.P.; Zhao, Z.J. Preliminary research of the farming production pattern in the Central Plain area during the Miaodigou Period. *Quat Sci* 2020, 40, 472–485. (In Chinese)
107. Zhao, Z.J. Changes and Development of Ancient Agriculture on Weihe Plain — — An Analysis of Plant Remnants Excavated from Dongyang Site in Huaxian District. *Huaxia Archaeol*, 2019, 15, 70–84. (In Chinese)
108. Henan Provincial Institute of Cultural Relics and Archaeology. Sanmenxia Nanjiaokou Science Press: Beijing, China, 2009; pp: 316–320. (In Chinese)
